1 **Genome size variation and species diversity in salamanders**

2 **Bianca Sclavi** <sup>1\*</sup> **and John Herrick** <sup>2\*\*</sup>

3 Author affiliations:

4 1. LBPA, UMR 8113, ENS Paris-Saclay, 95235 Cachan, France

5 2. Department of Physics, Simon Fraser University, 8888 University Drive, Burnaby, British  
6 Columbia V5A 1S6, Canada

7

8 \* Corresponding author

9 \*\* Corresponding author at 3, rue des Jeûneurs, 75002 Paris, France.

10 E-mail addresses: [jhenryherrick@yahoo.fr](mailto:jhenryherrick@yahoo.fr) (J. Herrick), [sclavi@lbpa.ens-cachan.fr](mailto:sclavi@lbpa.ens-cachan.fr) (B. Sclavi).

11 Running head: Salamander genome size and species diversity

12 *Keywords:* C-value, species diversity, body size, Urodela, geographical area

13

14

15

16

17

18

19

20

21

22

23

24

25 **Abstract:** Salamanders (Urodela) have among the largest vertebrate genomes, ranging in size from 10 to  
26 120 pg. Although changes in genome size often occur randomly and in the absence of selection pressure,  
27 non-random patterns of genome size variation are evident among specific vertebrate lineages. Here we  
28 report i) an unexpected relationship between genome size (C-value) and species richness at the family  
29 taxonomic level in salamander clades; ii) C-value and species richness both correlate with clade crown-  
30 age but not with diversification rates; iii) C-value is strongly associated with geographical area.  
31 Consistent with this observation we found that iv) genome size in salamanders is also strongly related to  
32 climatic niche rate. Finally, we report a relationship between C-value diversity and family-level species  
33 diversity as measured by the coefficient of variation of genome size within clades. Based on these  
34 results we propose that variation in C-value and genomic organization (heterochromatin content and  
35 gene synteny) might underlie variation in species richness in agreement with the Geographical Area  
36 Hypothesis. These observations suggest that changes in C-value, and hence changes in the amount  
37 and/or organization of non-coding DNA in the vertebrate genome, are associated with the allelic  
38 incompatibility believed to drive reproductive isolation and speciation in salamanders.

39

40

41

42

43

44

45

46

47

## 48 **Introduction**

49 Genome size in vertebrates varies more than three hundred fold from 0,4 picograms (pg) in pufferfish to  
50 over 120 picograms (pg) in lungfish (Gregory 2015). Most of the variation in vertebrate genome size  
51 corresponds to differences in non-coding DNA such as transposable elements, microsatellites and other  
52 types of repetitive and intergenic DNA (Metcalf and Casane 2013). The DNA accounting for  
53 differences in genome size between related species has previously been considered devoid of any  
54 universal function such as gene regulation, structural maintenance and protection against mutagens  
55 (Palazzo and Gregory 2014). Genome size, however, is known to have a direct impact on important  
56 physiological parameters such as cell size, cell cycle duration and developmental time (Cavalier-Smith  
57 1978, Francis, Davies et al. 2008). C-values, which measure genome size, are exceptionally high and  
58 vary more widely in salamanders compared to most other vertebrates (Sessions 2008), making the  
59 Urodela an attractive model for studying genome size variation and its biological effects between and  
60 within taxonomically related vertebrate clades.

61  
62 In addition to its impact on cell physiology, genome size frequently correlates with a number of  
63 ecological and physiological parameters including climate, metabolic rate, extinction risk and species  
64 diversity (Sessions and Larson 1987 , Gregory 2004, Mank and Avise 2006). A comparative study  
65 across vertebrates, for example, has found some evidence for a negative correlation between species  
66 diversity and genome size above the class-level of clades (Olmo 2006, Kraaijeveld 2010). The strongest  
67 association between genome size and species diversity was observed at C-values greater than 5 pg.  
68 Consistent with reduced species diversity in vertebrates with large genomes, at higher taxonomic levels  
69 extinction risk was found to increase with genome size (Vinogradov 2004). Consequently, species  
70 number might correlate negatively with the proportion of repetitive DNA (Olmo 2006), suggesting that

71 either evolvability (propensity to speciate) or extinction risk varies according to the amount of non-  
72 coding DNA present in the genome.

73

74 The large genomes of salamanders containing disproportionate amounts of non-coding DNA therefore  
75 represent a potentially important factor that is influencing species diversity across the Urodela. While  
76 some Urodela clades, such as the Plethodontidae and Salamandridae, are exceptionally rich in species  
77 number, other family-level clades are extremely species poor. Why species diversity varies so widely  
78 among salamander clades remains unclear, though many physiological and environmental factors are  
79 known to contribute to differences in Urodela species diversity (Nevo and Beiles 1991, Pyron and Wiens  
80 2013). Recently, for example, it has been shown in salamanders and songbirds that species richness is  
81 strongly associated with climatic niche evolution (Kozak and Wiens 2010, Kozak and Wiens 2016, Title  
82 and Burns 2015, Cooney 2016).

83

84 The large Urodela genomes have been attributed to slow losses of DNA in salamanders compared to  
85 other vertebrates (Sun, López Arriaza et al. 2012). The mechanisms underlying the slower loss rates  
86 remain to be elucidated, but cell cycle checkpoints and DNA repair systems likely play an important role  
87 in the evolution of large genomes and mutation rate variation (Herrick 2011, Sun and Mueller 2014).  
88 Variations in the proportion of non-coding DNA in genomes (eg. indels), for example, correspond to *de*  
89 *facto* mutations that have occurred during the course of genome evolution (Böhne, Brunet et al. 2008,  
90 Jurka, Bao et al. 2012).

91

92 Consistent with low mutation rates in organisms with large genomes, earlier studies have revealed  
93 exceptionally low levels of genetic diversity in salamanders (Pierce and Mitton 1980, Nevo and Beiles

94 1991), yet the sources of the low genetic variation remain unclear (Larson 1981, Parker and Kreitman  
95 1982). Genetic variation is a determining factor in both evolvability and extinction risk (Frentiu,  
96 Ovenden et al. 2001, Vinogradov 2004, Matsui, Tominaga et al. 2008, Hughes, Schmidt et al. 2015), and  
97 is therefore potentially associated with species diversity. Hence, the low levels of genetic variation in  
98 gene-expressing regions in salamander genomes (Pierce and Mitton 1980, Karlin and Means 1994),  
99 suggests that genome size might also influence species diversity in salamanders. A potential relationship  
100 between genome size and species diversity, however, remains to be established across salamander  
101 clades. In the following, we investigate the relationship between genome size and species diversity in  
102 the Urodela.

103

#### 104 **Materials and methods**

105 **Genome sizes** were obtained from the Animal Genome Size Database (Gregory 2015). C-value refers to  
106 haploid nuclear DNA content (1C). Reported polyploids, when indicated in the Animal Genome Size  
107 Database, were removed from the analyses. Average C-values were determined for each genus  
108 belonging to a given family-level clade. These values were then used to calculate the average C-value of  
109 each family-level clade. The C-value for each species in turn is determined as the average of the  
110 available values for that species when more than one C-value is recorded in the database. Each average  
111 of averages is weighted either by the number of entries in the database for a given species, or by the  
112 number of species in a genus. The weighting is independent of branch lengths.

$$113 \text{Average C value} = \frac{\sum_{i=1}^n \mu_i N_i}{\sum_{i=1}^n N_i}$$

114 To measure the average C-value for a genus of n species, each species has an average C-value  $\mu$   
115 calculated from N entries. The distributions in genome size for each salamander family and among the  
116 genera of Plethodontidae have been published previously (Herrick and Sclavi 2014).

117

118 **The data on crown age, stem age, species diversity and geographic area** were obtained from Pyron  
119 and Wiens (Pyron and Wiens 2013). Both the maximum likelihood (ML) and the time-calibrated trees  
120 used here were obtained from those of Pyron and Wiens (Pyron and Wiens 2011, Pyron 2011). They  
121 obtained the time-calibrated tree by determining divergence times from a set of fossil constraints using  
122 treePL developed by S.A. Smith (Smith and O'Meara 2012), and applied to the ML phylogeny  
123 determined previously for 2871 species using data from 3 mitochondrial and 9 nuclear genes (Pyron and  
124 Wiens 2011). They determined species diversity from the assignment of all known amphibian species to  
125 clades as classified in their phylogeny (Pyron and Wiens 2011).

126

127 The Pyrons and Wiens ML and time-calibrated trees were used to create a tree at the family level by first  
128 automatically assigning the species to families using the taxize package in R (Chamberlain and Szöcs  
129 2013). These were manually verified against the taxonomy of the Pyrons and Wiens tree. The  
130 HighLevelTree function in the EvobiR package in R by Heath Blackmon was used to obtain the family  
131 level trees (evobiR: evolutionary biology in R. R package version 1.0. [http://CRAN.R-](http://CRAN.R-project.org/package=evobiR)  
132 [project.org/package=evobiR](http://CRAN.R-project.org/package=evobiR)).

133

134 **Regression analysis:** The pglS analysis was carried out in R with the *caper* package. The maximum  
135 likelihood value of lambda was allowed to vary while kappa and delta were set to 1 as in Kozak and  
136 Wiens (Ecology and Evolution 2016). The time-calibrated family tree was obtained from the Amphibia  
137 tree of Pyron and Wiens (Pyron and Wiens 2013), or the phylogenetic tree from Kozak and Weins  
138 (Kozak and Wiens 2010) for the Plethodontidae dataset.

139

140 **Results**

141 *Species diversity, body size and C-value variation at the family-level of urodeles clades.*

142 The oldest known urodeles date from 166 to 168 Mya (Marjanovic and Laurin 2014, Laurin, Canoville  
143 et al. 2015). The urodeles inhabit a wide variety of ecological niches and exhibit a large diversity of life-  
144 history traits, including small and large body sizes, paedomorphy, metamorphosis and direct  
145 development (Wake 2009). In an earlier study of Amphibia, Pyron and Wiens revealed a number of  
146 ecological correlates between species diversity and variables such as geographical latitude, geographic  
147 range and environmental energy (Pyron and Wiens 2013). Species diversity in frogs, salamanders and  
148 caecilians also varies according to abiotic factors such as humidity and temperature and biotic factors  
149 such as productivity and rates of diversification (extinction and speciation). Figure 1 shows the  
150 phylogenetic tree derived from Pyron and Wiens that was used here to investigate the relationship  
151 between salamander genome size and species diversity (Pyron and Wiens 2011). Substantial variations  
152 in species diversity, body size and C-value among and within clades is apparent in the phylogenetic tree  
153 of the Urodela.

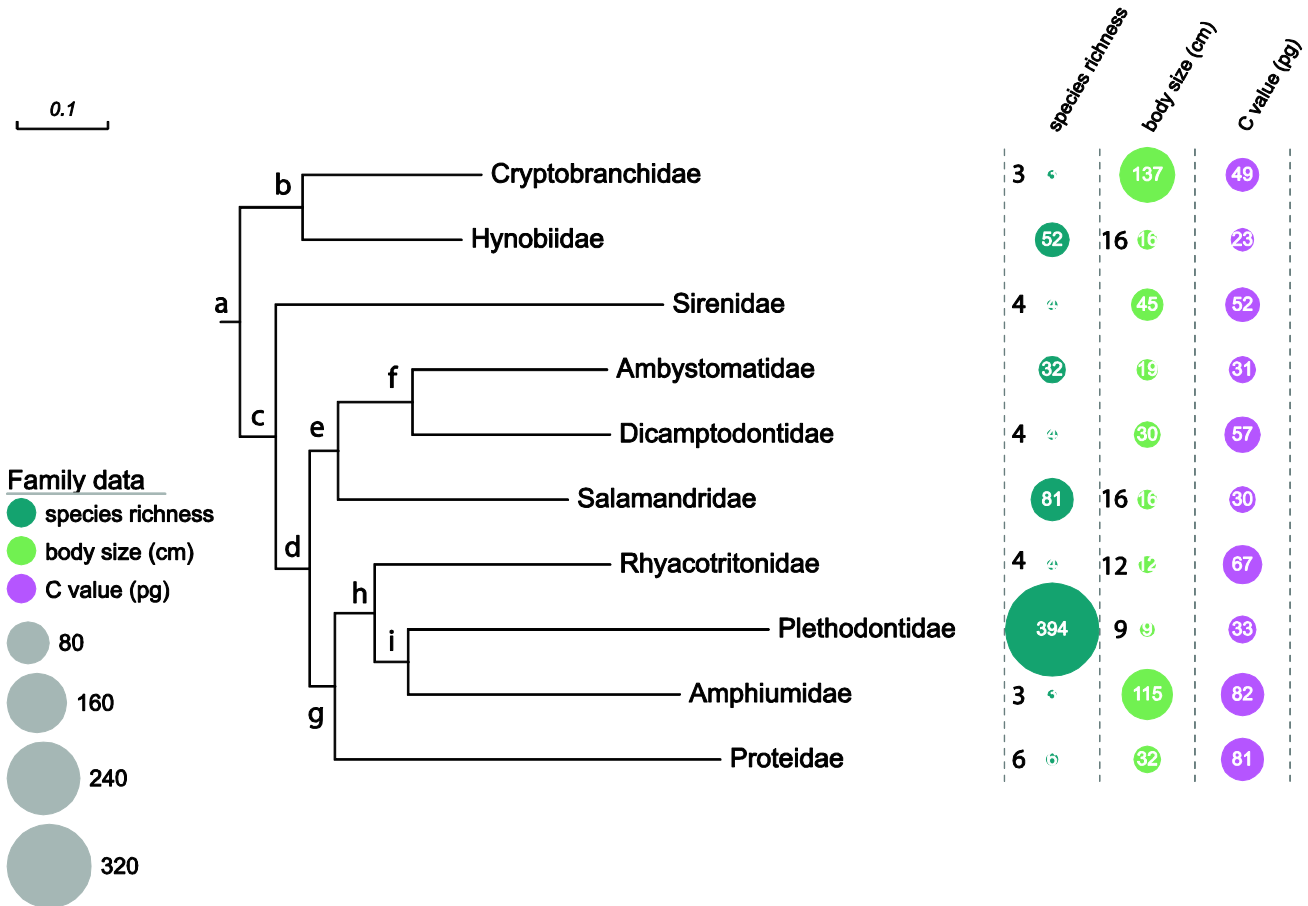

154

155 **Figure 1. Maximum likelihood phylogenetic tree of Caudata derived from Pyron and Wiens 2011.**  
 156 Terminal branch lengths shown are the distances measured as substitutions per site up to the crown  
 157 origin of each family. Species diversity, body size and average C-value are shown next to the family  
 158 name in circles proportional to size. The branch length is indicated by the scale bar. Six families form  
 159 three sister-pair taxa: nodes i, f and b, which correspond to the most recent common ancestor (MRCA)  
 160 of the subtending families. Figure created using EvolView (Zhang, Gao et al. 2012).  
 161

162 *Crown age, but not diversification rate, correlates with clade diversity*

163 Among animal taxa, it has been reported that clade age rather than diversification rate explains species  
 164 richness (McPeck and Brown 2007). A more recent study of amphibians, birds and mammals supports  
 165 the finding that time (older lineages), and not diversification rates, explains extant species richness  
 166 (Marin and Blair Hedges 2016). A significant positive correlation between crown group age at the  
 167 family level and species diversity has also been reported in salamanders (Eastman and Storer 2011). In



168 contrast to these reports, our initial ordinary least squares (OLS) analysis at the family-level of Urodela  
169 did not confirm a significant relationship between crown age and species richness (Figure 1S).

170

171 We determined, however, that the family Proteidae represents an outlier in the regression analyses  
172 (studentized residual: 2.35; studentized deleted residual: 3.94). We further determined that the outlier  
173 status of the Proteidae is due to a single monotypic genus: the European *Proteus anguinus*, the only  
174 genus in the Proteidae clade found outside of North America. Monotypic groups complicate estimates of  
175 crown age (Wiens 2017). Excluding this monotypic genus from the regression analysis changes the  
176 Proteidae family-level crown age of 121 Mya to that of the *Necturus* genus-level crown age of 13 Mya  
177 ([www.timetree.org](http://www.timetree.org)). We repeated the OLS in the absence of *Proteus anguinus*, and found a significant  
178 relationship between crown age and species richness (Figure 2A; Table 1). Phylogenetic generalized  
179 least squares (PGLS) analysis confirmed that species diversity in salamanders increases with clade age:  
180 older clades tend to have higher species diversity than comparatively younger clades (Table 1). In  
181 contrast to crown age, we found no correlation between stem age and clade diversity at the family level  
182 ( $R^2 = 0.1$ ;  $P = 0.8$ ; Table 1), in agreement with earlier reports on other taxa (Rabosky, Slater et al. 2012,  
183 Stadler, Rabosky et al. 2014, Wiens 2017). These observations underscore the outlier status of the single  
184 species *Proteus anguinus* in the regression analyses performed here. We have therefore conducted the  
185 following analyses with and without this species to examine the relationship between C-value and other  
186 physiological and ecological parameters (see Table S1 and Table 1).

187

188 Diversification rates have also been associated with extant species richness (Wiens 2017). Initial OLS  
189 regression analysis between species richness and diversification rates using the Pyron and Wiens dataset  
190 revealed a weak correlation between these two variables in the Urodela clades examined here ( $R^2 =$

191 0,22;  $P=0.11$ ; Supplementary Figure 2). PGLS regression analysis confirmed a non-significant  
192 relationship between diversification rate and species richness ( $R^2 = 0.18$ ;  $P = 0.12$ ), suggesting that clade  
193 ages rather than diversification rates better explain species richness patterns at the family-level of  
194 Urodela clades.

195  
196 *Average C-value correlates with crown age but not diversification rate.*

197 The ancestral Amphibia genome (C-value  $\sim 3$  pg) has experienced massive amplification during the  
198 evolution of the Urodela (Organ, Canoville et al. 2011, Organ, Struble et al. 2016). An early ancestor of  
199 salamanders, for example, has been estimated to have a large genome size of approximately 36.7 pg,  
200 which is similar to the reconstructed ancestral genome size of  $\sim 32$  pg (Laurin, Canoville et al. 2015). An  
201 earlier study suggested that genome size in salamanders has increased with time, although the exact rate  
202 of increase remains unclear (Martin and Gordon 1995, Sessions 2008). We therefore examined the  
203 relationship between phylogenetic stem age and genome size, but found no significant relationship  
204 between stem age and C-value (Table 1) (Supplementary Figure 3). Examination of the relationship  
205 between crown age and C-value using the Pyron and Wiens dataset, in contrast, revealed a significant  
206 negative relationship between C-value and crown age ( $R^2 = 0.66$ ;  $P = 0.025$ ; Figure 2B). PGLS  
207 regression analysis confirmed a strong negative correlation between C-value and crown age at the  
208 family-level of Urodela clades ( $R^2 = 0,7$   $P = 003$ ; Table 1).

209  
210 We next investigated the relationship between C-value and diversification rate using the data on  
211 diversification rates from Pyron and Wiens. Using OLS, C-value is not significantly correlated with  
212 diversification rate ( $R^2 = 0.13$ ;  $P = 0.16$ ; Table 1). Species richness normalized by crown age  
213 corresponds to the net diversification rate of a clade (Kozak and Wiens 2016). We therefore examined

214 the relationship between net diversification rates and C-value, and found that the relationship between  
215 C-value and net diversification rate is also not significant ( $R^2 = 0.18$ ;  $P = 0.12$ ; Table 1).

216

217 *C-value is related to species richness.*

218 Figure 1 suggests that C-value is negatively associated with both species diversity and body size. Our  
219 analysis of body size did not reveal a significant relationship between C-value and average body size  
220 (Supplementary Figure 4 AB; Table 1). To further characterize the apparent trend between C-value and  
221 species diversity revealed in the tree, we plotted species richness values against C-values obtained from  
222 the Animal Genome Size Database (Gregory 2015). Figure 2C reveals a clear trend between average C-  
223 value of a clade at the family level and its corresponding species diversity ( $R^2 = 0.46$ ;  $P = 0.02$ ). PGLS  
224 analysis confirmed the association between C-value and species richness (Table 1): as C-value decreases  
225 below 50 pg, clade diversity increases more than 10X. The sister clades Hynobidae and  
226 Cryptobranchidae, for example, differ over 2X with respect to average genome size and over 10X with  
227 respect to species diversity. The other two sister clades apparent in Figure 1 exhibit a similar trend  
228 (Amphiumidae: Plethodontidae; Dicamptodontidae: Ambystomatidae). Together, these observations  
229 suggest that the relationship between C-value and species richness is independent of phylogenetic  
230 relatedness.

231

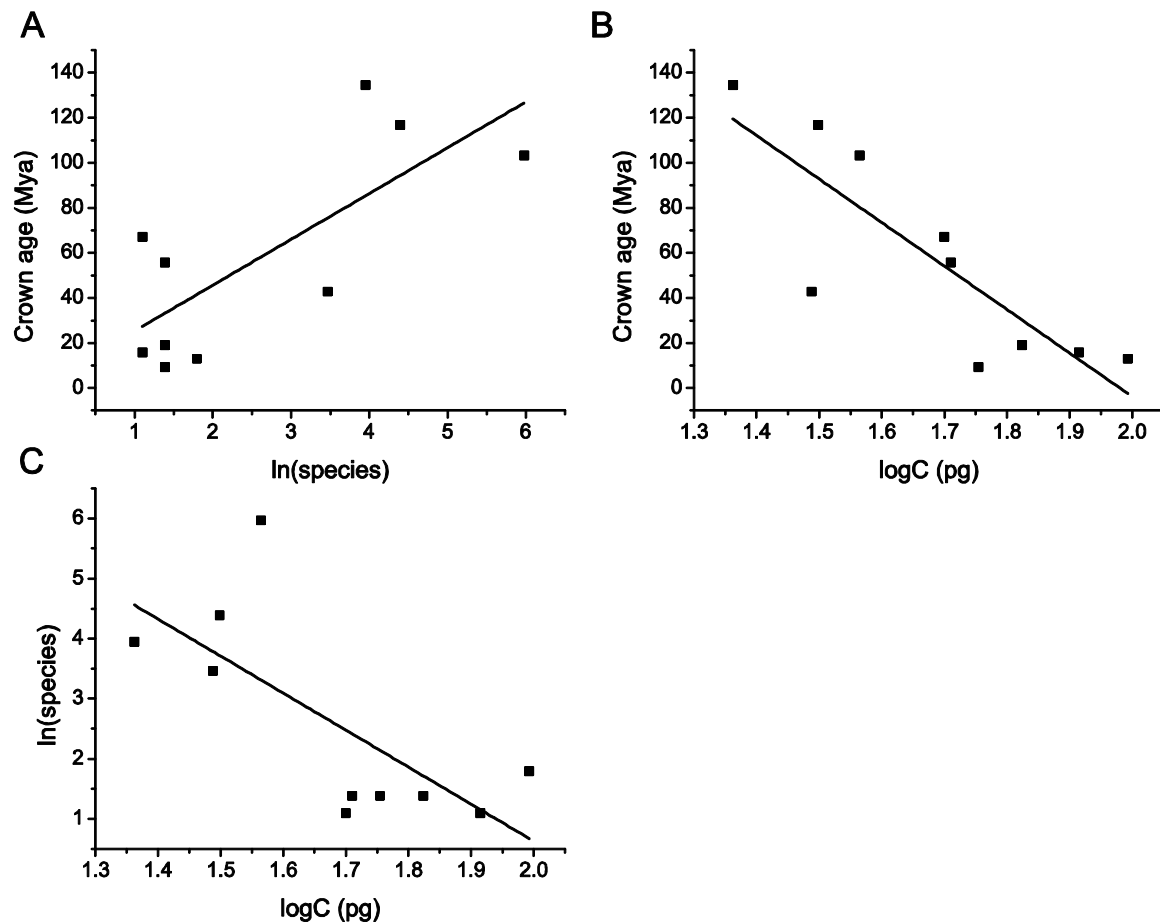

232

Figure 2

233 **Figure 2: Species diversity is negatively associated with C-value.** Correlations between crown age,  
234 species richness and genome size in Urodele. The regression line corresponds to ordinary least squares.  
235 The results of the ordinary least squares fit are shown in Supplementary Table 1. The results from the  
236 pgl analysis are shown in Table 1. The data on crown age and species richness is from (Pyron and  
237 Wiens 2013).

238

239 *Geographic area correlates with species richness and C-value.*

240 Older clades (crown age) have had more time to disperse over larger areas, suggesting that geographic  
241 area might correlate positively with species richness. The OLS results shown in Figure 3A reveal a  
242 positive relationship between clade diversity and geographic area in urodeles. PGLS analysis confirmed  
243 a strong relationship between species richness and geographic area ( $R^2 = 0.6$ ,  $P = 0.006$ ; Table 1). In

244 contrast, a strong negative correlation was found between C-value and geographic area: clades with  
245 smaller average genome sizes occupy larger geographic areas (Figure 3B;  $R^2 = 0.66$ ;  $P = 0.002$ ). PGLS  
246 analysis confirmed the strong association between average genome size and geographic area ( $R^2 = 0.74$ ;  
247  $P = 0.0008$ ; Table 1).

248  
249 *Climatic niche evolution is associated with both area and C-value.*

250 Larger geographic areas are expected to comprise higher levels of both habitat and niche diversity,  
251 suggesting that geographic range at the family-level of Urodela clades is associated with the rate of  
252 climatic-niche evolution (Kozak and Wiens 2010, Pyron and Wiens 2013). OLS analysis revealed a  
253 positive relationship between niche rate and area ( $R^2 = 0.54$ ;  $P = 0.009$ ; Figure 3C), as well as a negative  
254 relationship between niche rate and average C-value ( $R^2 = 0.48$ ;  $P = 0.015$ ; Figure 3D). PGLS analyses  
255 confirmed that niche rate is significantly related to area, C-value and species richness (Table 1).

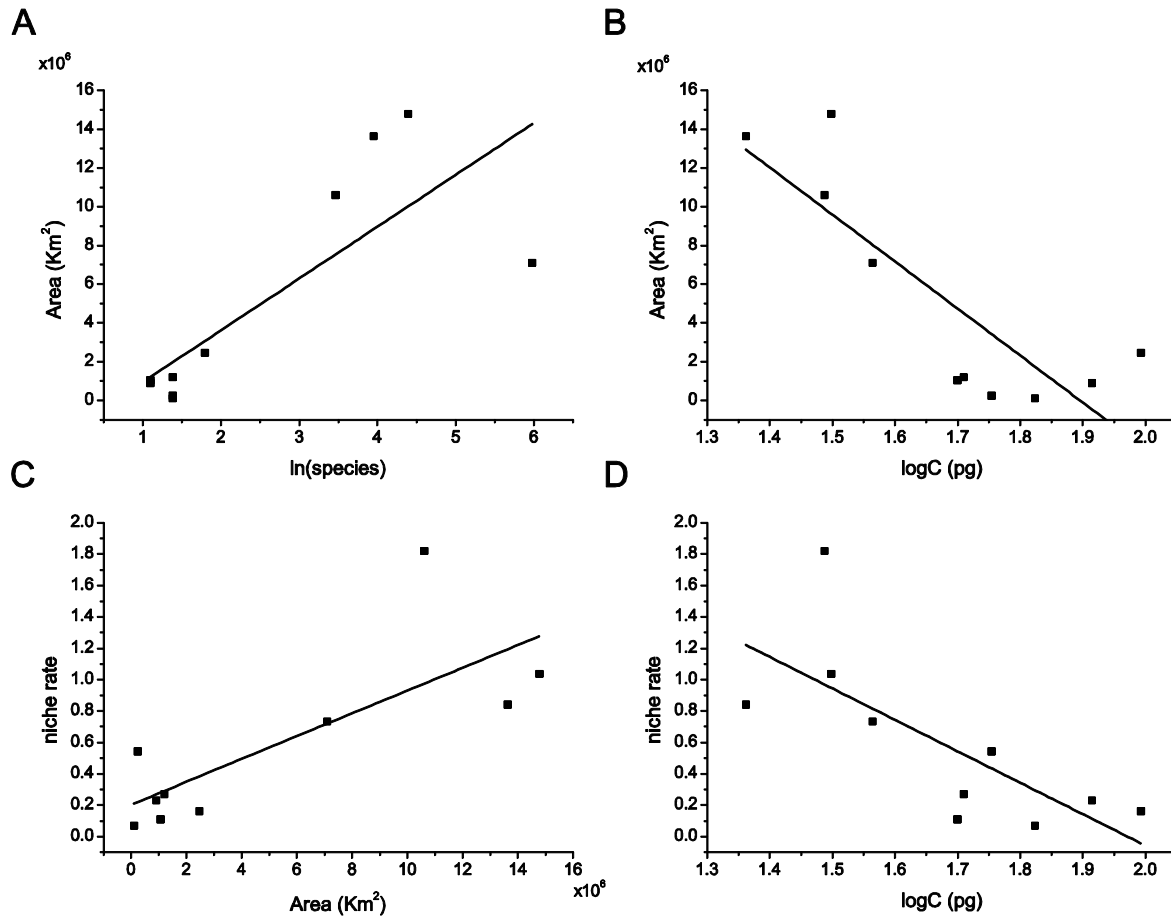

Figure 3

256

257 **Figure 3: Correlations between area, species richness, genome size and niche rate.** The regression  
258 line corresponds to ordinary least squares. The results of the ordinary least squares fit are shown in  
259 Supplementary Table 1. The results from the pglS analysis are shown in Table 1. Area, species richness  
260 and niche rate data were obtained from (Pyrón and Wiens 2013).

261

262 *Plethodontids*

263 A significant relationship has previously been reported between diversification rate and niche rate in 15  
264 plethodontid clades (Kozak and Wiens 2010). Our analysis reveals that niche rate and diversification  
265 rate are similarly related at the family-level of Urodela clades ( $R^2 = 0.44$ ;  $P = 0.02$ ; Supplementary  
266 Figure 6A; Table 1). Using the values of niche rate for plethodontids reported in Kozak and Wiens 2016,  
267 we also found a strong association between C-value and niche rate at this lower taxonomic level ( $R^2 =$

268 0.48;  $P = 0.025$ ; Supplementary Figure 6B; Table 2). In contrast, C-value in plethodontids is not  
269 associated with either geographic area, diversification rates, or species diversity (Table 2).

270

### 271 *Genome size diversity and species diversity*

272 Together, our results suggest a potential relationship between species diversity and genome size  
273 diversity: clades with higher levels of species diversity are expected to have correspondingly higher  
274 levels of genome size diversity. Genome size is expected to evolve in a manner that is proportional to C-  
275 value, suggesting that larger genomes are changing faster in size compared to smaller genomes (Oliver,  
276 Petrov et al. 2007). Taxonomic groups with larger genomes sizes should therefore exhibit higher  
277 genome size diversity. The coefficient of variation (CV) of the log of C-value was used here to assess  
278 genome size diversity. We found a negative relationship between average C-value in a clade and its  
279 corresponding CV; however, the relationship was not significant despite the apparent trend (Figure 4A;  
280  $R^2 = 0.25$ ;  $P = 0.14$ ).

281

282 We next examined the relationships between CV of C-value and the other diversity variables. Figure 4B  
283 reveals a very strong relationship between CV of C-value and species diversity (Table 1), as expected if  
284 genome size has been evolving in parallel with species diversity since the emergence of the different  
285 family-level salamander clades. Consistent with an increase in species diversity with time, we also found  
286 a significant relationship between crown age and the CV of C-value ( $R^2 = 0.53$ ;  $P = 0.04$ ; Figure 4C).  
287 CV of C-value, however, did not correlate significantly with area, niche rate or diversification rate  
288 (Table 1.).

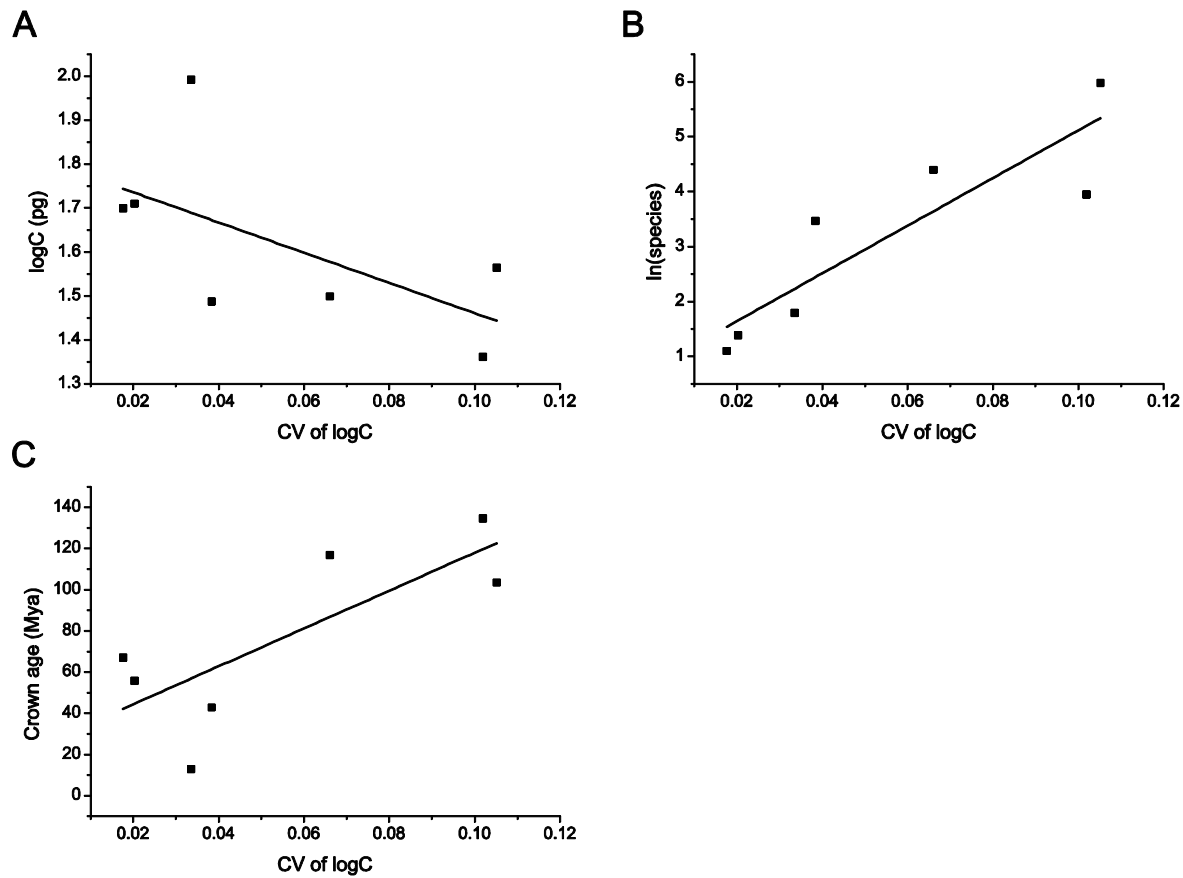

Figure 4

289

290 **Figure 4: Correlations between the CV of log(C-value), species richness and crown age.** The  
291 regression line corresponds to ordinary least squares. The results of the ordinary least squares fit are  
292 shown in Supplementary Table 1. The results from the pglis analysis are shown in Table 1. Crown age  
293 and species richness data were obtained from (Pyrone and Wiens 2013).

294

295

## 296 Discussion

297 We report here a relationship between average genome size and species diversity at the family level of  
298 Urodela clades (Figure 2B). Although we cannot, based on these analyses, establish a causal relation  
299 between these two variables, our findings nevertheless provide evidence that C-value constitutes an  
300 additional trait associated with species diversity, at least in urodeles. We also acknowledge that our



301 sample size is limited (ten clades); however, the different and strongly significant correlations found  
302 here are remarkably consistent: C-value correlates with time, area, niche rate and species richness.  
303 Moreover, our findings on the correlation between C-value and niche rate as well as the correlation  
304 between diversification rate and niche rate are well supported by our additional analyses on the larger  
305 plethodontid dataset of Kozac and Wiens (n = 15). Examining other factors such as plethodontid clade  
306 age, geographic area and rate of climatic-niche evolution suggests that the relationship between genome  
307 size and species diversity is mediated directly or indirectly through a number of different variables. Our  
308 findings suggest that time and geographic area rather than diversification rate account for the  
309 relationship found here between species richness and C-value.

310

311 Some questions might be raised concerning the phylogenetic status of *P. anguinus*. The monophyly of  
312 the Proteidae has been controversial for several decades (Larsen and Guthrie 1974, Hecht and Edwards  
313 1976). Only relatively recently has this species been established as a bona fide member of the family  
314 Proteidae (Wiens, Bonett et al. 2005). In our analyses, however, this species constitutes a consistent  
315 outlier among the Proteidae suggesting that its relationship to the other Proteidae species is substantially  
316 more distant than between any of the other salamander species at the family taxonomic level (Weisrock,  
317 Harmon et al. 2005). Including *P. anguinus* in the same taxonomic group as Necturus, for example,  
318 results in anomalously high levels of Proteidae heterozygosity (Nevo and Beiles 1991), genome and  
319 body size variance and other genetic and physiological discrepancies that render the Proteidae a  
320 biometric outlier in the Urodela group. Here we have controlled for the outlier status of *P. anguinus* by  
321 performing our analyses with and without this species. We find that, although the correlations with C-  
322 value are significantly weakened, including *P. anguinus* in the analyses does not change the overall

323 conclusion: genome size and genome size diversity are closely associated with species richness, climatic  
324 niche rate and clade crown age (Table S1).

325

326 What is the nature of the relationship between average C-value and these different ecological variables  
327 in the Urodela? Sessions reported that the range in genome size in family-level Urodela clades tends to  
328 increase as their average C-values decrease (Sessions 2008), suggesting a potential relationship between  
329 genome size diversity and average genome size in a clade. Our analysis does not support a significant  
330 relationship between CV of genome size and C-value. We did find, however, a significant relationship  
331 between CV of genome size and both species richness and crown age, suggesting that diversification of  
332 genome size over time coincided with diversification of species in a clade. In contrast, genome size  
333 diversity is not significantly related to geographic range (Table 1 and Supplementary Table 1). These  
334 observations suggest that changes in genome size underlie speciation events in urodeles, consistent with  
335 findings in plants that rates of genome size evolution correlate with rates of speciation (Puttick, Clark et  
336 al. 2015).

337

338 We note that the observations made here concerning average C-value and species diversity apply  
339 predominantly to the family-level of Urodela clades. At lower taxonomic levels such as the  
340 plethodontids, the relationship between genome size and species richness shows no consistent pattern.  
341 The Bolittoglossinae, for example, tend to have larger clade-average genome sizes but higher species  
342 diversity than other genera in the plethodontids. Indeed, the Plethodontidae as a group exhibit the  
343 highest levels of species diversity among family-level Urodela clades (Wake 2009), and have  
344 correspondingly elevated levels of genome size diversity and substitution rates (Herrick and Sclavi  
345 2014). Genome sizes range from ~10 pg in the genus *Grynophilus*, for example, to over 70 pg in the

346 genus *Hydromantes*. C-values in *Plethodon* alone, one of the most species rich genera of  
347 Plethodontidae, range from 18 pg in *P. Shenandoah* to 69 pg in *P. vandykei*, suggesting a more general  
348 relationship between genome size evolution, mutation rate and speciation. We suggest that genome size  
349 diversity, rather than genome size itself, reflects the correspondingly higher substitution rates previously  
350 reported for the plethodontidae as a group (Herrick and Sclavi 2014).

351

352 Together, our analyses support the *Geographic Range Hypothesis*, according to which taxa with wider  
353 geographic distributions have higher probabilities that genetic changes such as indels, chromosomal  
354 inversions and transposon-mediated modifications in genome size will become fixed in a population  
355 (Feder, Gejji et al. 2011, Martinez, Jacobina et al. 2017). If habitat and niche availability both increase  
356 with geographic area, then our observations suggest that changes in genome size in urodeles might have  
357 occurred in parallel with adaptations that made available habitats and niches more accessible to  
358 dispersing ancestral populations. Since standardized contrasts can be interpreted as representing  
359 evolutionary rates (Oliver, Petrov et al. 2007), the strong correlation and negative slope between  
360 independent contrasts of clade area and C-value indicate that the rate at which C-value changes  
361 coincides with the rate at which geographic range changes (Supplementary Figure 6; adjusted  $R^2 = 0.74$ ;  
362  $P = 0.0009$ ).

363

364 In support of that proposal, a recent study on karyotypic diversification rates at the family level of  
365 mammalian clades suggests that large, past geographic distributions in heterogenous environments  
366 might have favored higher levels of chromosomal diversity; or conversely, higher rates of chromosomal  
367 diversification might have promoted colonization of new habitats and expanding geographic ranges  
368 (Martinez, Jacobina et al. 2017). These results are consistent with earlier results on the rate of karyotype

369 diversification in mammals, frogs and salamanders (Wilson, Sarich et al. 1974, Wilson, Bush et al. 1975,  
370 Bush, Case et al. 1977, Bengtsson 1980). These authors found that salamander genomes have slower  
371 rates of karyotype diversification than frogs, while frogs exhibit slower rates than mammals, suggesting  
372 that taxonomic groups with larger genomes on average have slower rates of genome evolution (Hooper  
373 and Price 2015, Leaché, Banbury et al. 2016). Our findings therefore support the proposal that genome  
374 turnover (eg. chromosomal inversions, translocations and rearrangements), in addition to changes in  
375 genome size, is a factor underlying speciation rates and extant species richness in vertebrates. We are  
376 currently investigating the hypothesis that genome diversification rates and corresponding levels of  
377 genome size and karyotype diversity, rather than absolute C-value, explain rates of molecular evolution  
378 and rates of speciation in Amphibia and other eukaryotes.

379

## 380 **Acknowledgements**

381 BS is supported by a grant from Human Frontier Science Program (RGY0079). JH benefited from  
382 support from John Bechhoefer's lab, Physics Department, Simon Fraser University.

383

## 384 **References**

- 385 Bengtsson, B. O. (1980). "Rates of karyotype evolution in placental mammals." *Hereditas* **92**(1): 37-47.
- 386 Bush, G. L., S. M. Case, A. C. Wilson and J. L. Patton (1977). "Rapid speciation and chromosomal  
387 evolution in mammals." *Proc Natl Acad Sci U S A* **74**(9): 3942-3946.
- 388 Böhne, A., F. Brunet, D. Galiana-Arnoux, C. Schultheis and J. N. Volff (2008). "Transposable elements  
389 as drivers of genomic and biological diversity in vertebrates." *Chromosome Res* **16**(1): 203-215.
- 390 Cavalier-Smith, T. (1978). "Nuclear volume control by nucleoskeletal DNA, selection for cell volume  
391 and cell growth rate, and the solution of the DNA C-value paradox." *J Cell Sci* **34**: 247-278.
- 392 Chamberlain, S. A. and E. Szöcs (2013). "taxize: taxonomic search and retrieval in R." *F1000Res* **2**:  
393 191.
- 394 Eastman, J. M. and A. Storfer (2011). "Correlations of life-history and distributional-range variation  
395 with salamander diversification rates: evidence for species selection." *Syst Biol* **60**(4): 503-518.

- 396 Feder, J. L., R. Gejji, T. H. Powell and P. Nosil (2011). "Adaptive chromosomal divergence driven by  
397 mixed geographic mode of evolution." Evolution **65**(8): 2157-2170.
- 398 Francis, D., M. S. Davies and P. W. Barlow (2008). "A strong nucleotypic effect on the cell cycle  
399 regardless of ploidy level." Ann Bot **101**(6): 747-757.
- 400 Frentiu, F., J. Ovenden and R. Street (2001). "Australian lungfish (*Neoceratodus forsteri*:Dipnoi) have  
401 low genetic variation at allozyme and mitochondrial DNA loci: A conservation alert?" Conservation  
402 Genetics **2**: 63-67.
- 403 Gregory, T. (2004). "Macroevolution, Hierarchy Theory, and the C-value Enigma." Paleobiology **30**(2):  
404 179-202.
- 405 Gregory, T. R. (2015). Animal Genome Size Database. <http://www.genomesize.com>.
- 406 Hecht, M. K. and J. L. Edwards (1976). "The determination of parallel or monophyletic relationships:  
407 The Proteidae salamanders-- a test case." American Naturalist **110**: 653-677.
- 408 Herrick, J. (2011). "Genetic variation and replication timing, or why is there late replicating DNA?"  
409 Evolution **65**(11): 3031-3047.
- 410 Herrick, J. and B. Sclavi (2014). "A new look at genome size, evolutionary duration and genetic  
411 variation in salamanders." Comptes Rendus Palevol **13**(7): 611-615.
- 412 Hooper, D. M. and T. D. Price (2015). "Rates of karyotypic evolution in Estrildid finches differ between  
413 island and continental clades." Evolution **69**(4): 890-903.
- 414 Hughes, J. M., D. J. Schmidt, J. A. Huey, K. M. Real, T. Espinoza, A. McDougall, P. K. Kind, S.  
415 Brooks and D. T. Roberts (2015). "Extremely low microsatellite diversity but distinct population  
416 structure in a long-lived threatened species, the Australian lungfish *Neoceratodus forsteri* (Dipnoi)." PLoS One **10**(4): e0121858.
- 417  
418 Jurka, J., W. Bao, K. K. Kojima, O. Kohany and M. G. Yurka (2012). "Distinct groups of repetitive  
419 families preserved in mammals correspond to different periods of regulatory innovations in vertebrates."  
420 Biol Direct **7**: 36.
- 421 Karlin, A. A. and D. B. Means (1994). "Genetic variation in the aquatic salamander genus *Amphiuma*."  
422 American Midland Naturalist **132**(1): 1-9.
- 423 Kozak, K. H. and J. J. Wiens (2010). "Accelerated rates of climatic-niche evolution underlie rapid  
424 species diversification." Ecol Lett **13**(11): 1378-1389.
- 425 Kozak, K. H. and J. J. Wiens (2016). "What explains patterns of species richness? The relative  
426 importance of climatic-niche evolution, morphological evolution, and ecological limits in salamanders."  
427 Ecol Evol **6**(16): 5940-5949.
- 428 Kraaijeveld, K. (2010). "Genome Size and Species Diversification." Evolutionary Biology **37**: 227-233.
- 429 Larsen, J. H. and D. J. Guthrie (1974). "Parallelism in the Proteidae reconsidered." Copeia: 635-643.
- 430 Larson, A. (1981). "A reevaluation of the relationship between genome size and genetic variation." The  
431 American Naturalist **118**(1): 119-125.
- 432 Laurin, M., A. Canoville, M. Struble and V. Buffrénil (2015). "Early genome size increase in urodeles."  
433 Comptes Rendus Palevol **15**(1-2): 74-82.

- 434 Leaché, A. D., B. L. Banbury, C. W. Linkem and A. N. de Oca (2016). "Phylogenomics of a rapid  
435 radiation: is chromosomal evolution linked to increased diversification in north american spiny lizards  
436 (Genus *Sceloporus*)?" BMC Evol Biol **16**: 63.
- 437 Mank, J. E. and J. C. Avise (2006). "Cladogenetic correlates of genomic expansions in the recent  
438 evolution of actinopterygian fishes." Proc Biol Sci **273**(1582): 33-38.
- 439 Marin, J. and S. Blair Hedges (2016 ). "Time best explains global variation in species richness of  
440 amphibians, birds and mammals " Journal of Biogeography **43**: 1069-1079.
- 441 Marjanovic, D. and M. Laurin (2014). "An updated paleontological timetree of lissamphibians with  
442 comments on the anatomy of Jurassic crown-group salamanders (Urodela)." Historical Biology: An  
443 International Journal of Paleobiology **26**(4): 535-550.
- 444 Martin, C. C. and R. Gordon (1995). "Differentiation trees, a junk DNA molecular clock, and the  
445 evolution of neoteny in salamanders." J. Evol. Biol. **8**(3): 339-354.
- 446 Martinez, P. A., U. P. Jacobina, R. V. Fernandes, C. Brito, C. Penone, T. F. Amado, C. R. Fonseca and  
447 C. J. Bidau (2017). "A comparative study on karyotypic diversification rate in mammals." Heredity  
448 (Edinb) **118**(4): 366-373.
- 449 Matsui, M., A. Tominaga, W. Z. Liu and T. Tanaka-Ueno (2008). "Reduced genetic variation in the  
450 Japanese giant salamander, *Andrias japonicus* (Amphibia: Caudata)." Mol Phylogenet Evol **49**(1): 318-  
451 326.
- 452 McPeck, M. A. and J. M. Brown (2007). "Clade age and not diversification rate explains species  
453 richness among animal taxa." Am Nat **169**(4): E97-106.
- 454 Metcalfe, C. J. and D. Casane (2013). "Accommodating the load: The transposable element content of  
455 very large genomes." Mob Genet Elements **3**(2): e24775.
- 456 Nevo, E. and A. Beiles (1991). "Genetic diversity and ecological heterogeneity in amphibian evolution."  
457 Copeia **19**(3): 565-592.
- 458 Oliver, M. J., D. Petrov, D. Ackerly, P. Falkowski and O. M. Schofield (2007). "The mode and tempo of  
459 genome size evolution in eukaryotes." Genome Res **17**(5): 594-601.
- 460 Olmo, E. (2006). "Genome size and evolutionary diversification in vertebrates." Italian Journal of  
461 Zoology **73**(2): 167 - 171.
- 462 Organ, C., M. Struble, A. Canoville, V. Bruffénil and M. Laurin (2016). "Macroevolution of genome  
463 size in sarcopterygians during the water–land transition." Comptes Rendus Palevol **15**(1-2): 65-73.
- 464 Organ, C. L., A. Canoville, R. R. Reisz and M. Laurin (2011). "Paleogenomic data suggest mammal-like  
465 genome size in the ancestral amniote and derived large genome size in amphibians." J Evol Biol **24**(2):  
466 372-380.
- 467 Palazzo, A. F. and T. R. Gregory (2014). "The case for junk DNA." PLoS Genet **10**(5): e1004351.
- 468 Parker, E. and M. Kreitman (1982). "On the relationship between heterozygosity and DNA content."  
469 The American Naturalist **119**(5): 749-752.
- 470 Pierce, A. and B. Mitton (1980). "The relationship between genome size and genetic variation." The  
471 American Naturalist **116**(6): 850-861.



- 472 Puttick, M. N., J. Clark and P. C. Donoghue (2015). "Size is not everything: rates of genome size  
473 evolution, not C-value, correlate with speciation in angiosperms." Proc Biol Sci **282**(1820): 20152289.
- 474 Pyron, R. A. and J. J. Wiens (2011). "A large-scale phylogeny of Amphibia including over 2800 species,  
475 and a revised classification of extant frogs, salamanders, and caecilians." Mol Phylogenet Evol **61**(2):  
476 543-583.
- 477 Pyron, R. A. and J. J. Wiens (2013). "Large-scale phylogenetic analyses reveal the causes of high  
478 tropical amphibian diversity." Proc Biol Sci **280**(1770): 20131622.
- 479 Pyron, R. A. a. W. J. J. (2011). "A large-scale phylogeny of Amphibia including over 2800 species, and  
480 a revised classification of extant frogs, salamanders, and caecilians." Molecular phylogenetics and  
481 evolution **61**(2): 543--583.
- 482 Rabosky, D. L., G. J. Slater and M. E. Alfaro (2012). "Clade age and species richness are decoupled  
483 across the eukaryotic tree of life." PLoS Biol **10**(8): e1001381.
- 484 Sessions, S. (2008). "Evolutionary cytogenetics in salamanders." Chromosome Res. **16**(1): 183-201.
- 485 Sessions, S. K. and A. Larson (1987 ). "Developmental correlates of genome size in plethodontid  
486 salamanders and their implications for genome size evolution." Evolution **41** (6): 1239-1251
- 487 Smith, S. A. and B. C. O'Meara (2012). "treePL: divergence time estimation using penalized likelihood  
488 for large phylogenies." Bioinformatics **28**(20): 2689-2690.
- 489 Stadler, T., D. L. Rabosky, R. E. Ricklefs and F. Bokma (2014). "On age and species richness of higher  
490 taxa." Am Nat **184**(4): 447-455.
- 491 Sun, C., J. R. López Arriaza and R. L. Mueller (2012). "Slow DNA loss in the gigantic genomes of  
492 salamanders." Genome Biol Evol **4**(12): 1340-1348.
- 493 Sun, C. and R. L. Mueller (2014). "Hellbender genome sequences shed light on genomic expansion at  
494 the base of crown salamanders." Genome Biol Evol **6**(7): 1818-1829.
- 495 Vinogradov, A. E. (2004). "Genome size and extinction risk in vertebrates." Proc Biol Sci **271**(1549):  
496 1701-1705.
- 497 Wake, D. (2009). "What Salamanders have Taught Us about Evolution." Ann. Rev. Ecol. Evol. Syst. **40**:  
498 333-352.
- 499 Weisrock, D. W., L. J. Harmon and A. Larson (2005). "Resolving deep phylogenetic relationships in  
500 salamanders: analyses of mitochondrial and nuclear genomic data." Syst Biol **54**(5): 758-777.
- 501 Wiens, J., R. Bonett and P. Chippindale (2005). "Ontogeny discombobulates phylogeny:  
502 paedomorphosis and higher-level salamander relationships." Syst Biol **54**(1): 91-110.
- 503 Wiens, J. J. (2017). "What explains patterns of biodiversity across the Tree of Life?: New research is  
504 revealing the causes of the dramatic variation in species numbers across branches of the Tree of Life."  
505 Bioessays **39**(3).
- 506 Wilson, A. C., G. L. Bush, S. M. Case and M. C. King (1975). "Social structuring of mammalian  
507 populations and rate of chromosomal evolution." Proc Natl Acad Sci U S A **72**(12): 5061-5065.
- 508 Wilson, A. C., V. M. Sarich and L. R. Maxson (1974). "The importance of gene rearrangement in  
509 evolution: evidence from studies on rates of chromosomal, protein, and anatomical evolution." Proc Natl  
510 Acad Sci U S A **71**(8): 3028-3030.

511 Zhang, H., S. Gao, M. J. Lercher, S. Hu and W. H. Chen (2012). "EvolView, an online tool for  
512 visualizing, annotating and managing phylogenetic trees." Nucleic Acids Res **40**(Web Server issue):  
513 W569-572.

514

515



516

|                                       | Adj R <sup>2</sup> | p             | AICc         | Pagel's $\lambda$ |
|---------------------------------------|--------------------|---------------|--------------|-------------------|
| <i>Area vs logC</i>                   | <b>0.70</b>        | <b>0.001</b>  | <b>332</b>   | <b>0</b>          |
| <i>Area vs species richness</i>       | <b>0.67</b>        | <b>0.002</b>  | <b>334</b>   | <b>0</b>          |
| <i>Area vs niche rate</i>             | <b>0.53</b>        | <b>0.01</b>   | <b>337</b>   | <b>0</b>          |
| <i>Area vs CV of logC</i>             | 0.47               | 0.05          | 239          | 0.001             |
| <i>Area vs crown age</i>              | <b>0.65</b>        | <b>0.003</b>  | <b>335</b>   | <b>0.568</b>      |
| <i>LogC vs area</i>                   | <b>0.74</b>        | <b>0.0008</b> | <b>-12.5</b> | <b>0</b>          |
| <i>LogC vs species richness</i>       | <b>0.69</b>        | <b>0.003</b>  | <b>-9</b>    | <b>1</b>          |
| <i>LogC vs sr/crown</i>               | 0.16               | 0.13          | -1.35        | 0                 |
| <i>LogC vs niche rate</i>             | <b>0.58</b>        | <b>0.006</b>  | <b>-7.4</b>  | <b>1</b>          |
| <i>LogC vs crown age</i>              | <b>0.7</b>         | <b>0.0015</b> | <b>-11.6</b> | <b>0</b>          |
| <i>LogC vs div. rate</i>              | 0.26               | 0.07          | -1.8         | 1                 |
| <i>CV of logC vs area</i>             | 0.47               | 0.05          | -25          | 0                 |
| <i>CV of logC vs logC</i>             | 0.38               | 0.08          | -24          | 0                 |
| <i>CV of logC vs niche rate</i>       | -0.04              | 0.428         | -21          | 0                 |
| <i>CV of logC vs crown age</i>        | <b>0.58</b>        | <b>0.03</b>   | <b>-27</b>   | <b>0</b>          |
| <i>CV of logC vs species richness</i> | <b>0.78</b>        | <b>0.005</b>  | <b>-30</b>   | <b>1</b>          |
| <i>CV of logC vs div rate</i>         | 0.12               | 0.23          | -22          | 0                 |
| <i>Species richness vs niche rate</i> | <b>0.39</b>        | <b>0.03</b>   | <b>37</b>    | <b>0</b>          |
| <i>Species richness vs div rate</i>   | 0.18               | 0.12          | 40           | 0                 |
| <i>Species richness vs crown age</i>  | <b>0.67</b>        | <b>0.002</b>  | <b>34</b>    | <b>1</b>          |

517

518

519

520

521

**Table 1. PGLS analysis for Salamander family-level clades of correlations of C-values with data from Pyrons and Wiens (Pyron and Wiens 2013) without *Proteus anguinus*.**

522

523

|                                              | <i>Adj R<sup>2</sup></i> | <i>p</i>     | <i>AICc</i> | <i>Pagel's λ</i> |
|----------------------------------------------|--------------------------|--------------|-------------|------------------|
| <i>LogC vs area</i>                          | 0.14                     | 0.09         | -12.65      | 0.313            |
| <i>LogC vs species richness</i>              | -0.07                    | 0.8          | -11         | 1                |
| <i>LogC vs sr/crown</i>                      | -0.07                    | 0.76         | -11         | 1                |
| <b><i>LogC vs niche rate</i></b>             | <b>0.48</b>              | <b>0.002</b> | <b>-19</b>  | <b>0</b>         |
| <i>LogC vs crown age</i>                     | -0.07                    | 0.76         | -11         | 1                |
| <i>LogC vs div. rate</i>                     | -0.02                    | 0.45         | -11         | 1                |
| <br>                                         |                          |              |             |                  |
| <b><i>Species richness vs area</i></b>       | <b>0.24</b>              | <b>0.04</b>  | <b>33</b>   | <b>0.976</b>     |
| <b><i>Species richness vs div rate</i></b>   | <b>0.47</b>              | <b>0.003</b> | <b>25</b>   | <b>0</b>         |
| <b><i>Species richness vs niche rate</i></b> | <b>0.33</b>              | <b>0.015</b> | <b>29</b>   | <b>0</b>         |
| <i>Species richness vs crown age</i>         | -0.07                    | 0.96         | 36          | 0.54             |
| <br>                                         |                          |              |             |                  |
| <b><i>Div rate vs crown</i></b>              | <b>0.36</b>              | <b>0.01</b>  | <b>-55</b>  | <b>0</b>         |
| <b><i>Div rate vs niche rate</i></b>         | <b>0.33</b>              | <b>0.015</b> | <b>-55</b>  | <b>0</b>         |
| <br>                                         |                          |              |             |                  |
| <i>Crown age vs area</i>                     | -0.07                    | 0.96         | 473         | 1                |

524

525

526

**Table 2. PGLS analysis of Plethodontidae data from Kozak and Wiens (Kozak and Wiens 2016).**

527 **Supplementary material**

528  
529

|                                       | Adj R <sup>2</sup> | p             | AICc       | Pagel's λ    |
|---------------------------------------|--------------------|---------------|------------|--------------|
| <i>Area vs logC</i>                   | <b>0.77</b>        | <b>0.0005</b> | <b>329</b> | <b>0</b>     |
| <i>Area vs species richness</i>       | <b>0.69</b>        | <b>0.002</b>  | <b>332</b> | <b>0</b>     |
| <i>Area vs niche rate</i>             | <i>No change</i>   |               |            |              |
| <i>Area vs CV of logC</i>             | 0.27               | 0.13          | 238        | 0            |
| <i>Area vs crown age</i>              | <b>0.45</b>        | <b>0.02</b>   | <b>337</b> | <b>0</b>     |
| <i>LogC vs area</i>                   | <b>0.80</b>        | <b>0.0003</b> | <b>-17</b> | <b>1</b>     |
| <i>LogC vs species richness</i>       | <b>0.69</b>        | <b>0.002</b>  | <b>-13</b> | <b>1</b>     |
| <i>LogC vs sr/crown</i>               | 0.12               | 0.17          | -4         | 0            |
| <i>LogC vs niche rate</i>             | <b>0.60</b>        | <b>0.005</b>  | <b>-11</b> | <b>1</b>     |
| <i>LogC vs crown age</i>              | 0.31               | 0.056         |            | 0.001        |
| <i>LogC vs div. rate</i>              | 0.22               | 0.09          | -4         | 1            |
| <i>CV of logC vs area</i>             | 0.27               | 0.13          | -26        | 0            |
| <i>CV of logC vs logC</i>             | 0.07               | 0.28          | -25        | 0            |
| <i>CV of logC vs niche rate</i>       | -0.14              | 0.62          |            | 0            |
| <i>CV of logC vs crown age</i>        | <b>0.7</b>         | <b>0.01</b>   | <b>-32</b> | <b>0</b>     |
| <i>CV of logC vs species richness</i> | 0.49               | 0.05          | -29        | 0            |
| <i>CV of logC vs div rate</i>         | -0.05              | 0.44          | -24        | 0            |
| <i>Species richness vs niche rate</i> | <b>0.38</b>        | <b>0.03</b>   | <b>35</b>  | <b>0</b>     |
| <i>Species richness vs div rate</i>   | 0.18               | 0.12          | 38         | 0            |
| <i>Species richness vs crown age</i>  | <b>0.36</b>        | <b>0.04</b>   | <b>36</b>  | <b>0.001</b> |

530  
531  
532  
533  
534  
535  
536

**Supplementary Table 1. PGLS analysis for Salamander family-level clades of correlations of C-values with data from Pyrons and Wiens (Pyron and Wiens 2013) including *Proteus anguinus*.**

537

|                                              | <i>Adj R<sup>2</sup></i> | <i>p</i>     |
|----------------------------------------------|--------------------------|--------------|
| <b><i>LogC vs area</i></b>                   | <b>0.66</b>              | <b>0.002</b> |
| <b><i>LogC vs species richness</i></b>       | <b>0.46</b>              | <b>0.02</b>  |
| <i>LogC vs sr/crown</i>                      | 0.18                     | 0.12         |
| <b><i>LogC vs niche rate</i></b>             | <b>0.48</b>              | <b>0.015</b> |
| <b><i>LogC vs crown age</i></b>              | <b>0.66</b>              | <b>0.025</b> |
| <i>LogC vs stem</i>                          | 0.1                      | 0.8          |
| <i>LogC vs div. rate</i>                     | 0.13                     | 0.16         |
| <b><i>Species richness vs crown age</i></b>  | <b>0.52</b>              | <b>0.01</b>  |
| <i>Species richness vs stem age</i>          | -0.09                    | 0.64         |
| <i>Species richness vs div rate</i>          | 0.2                      | 0.11         |
| <i>Species richness vs niche rate</i>        | 0.32                     | 0.05         |
| <b><i>Species richness vs CV of logC</i></b> | <b>0.75</b>              | <b>0.007</b> |
| <b><i>Area vs species richness</i></b>       | <b>0.6</b>               | <b>0.006</b> |
| <b><i>Area vs niche rate</i></b>             | <b>0.54</b>              | <b>0.009</b> |
| <i>Area vs CV of logC</i>                    | 0.33                     | 0.1          |
| <b><i>Area vs crown age</i></b>              | <b>0.58</b>              | <b>0.006</b> |
| <i>CV of logC vs logC</i>                    | 0.25                     | 0.14         |
| <i>CV of logC vs niche rate</i>              | -0.08                    | 0.49         |
| <b><i>CV of logC vs crown age</i></b>        | <b>0.53</b>              | <b>0.04</b>  |
| <i>CV of logC vs div rate</i>                | 0.16                     | 0.2          |
| <b><i>Niche rate vs div rate</i></b>         | <b>0.42</b>              | <b>0.02</b>  |

538

539

540

541

**Supplementary Table 2: results of OLS analysis for family-level clades of Salamanders family-level clades data from Pyrons and Wiens (Pyron and Wiens 2013).**

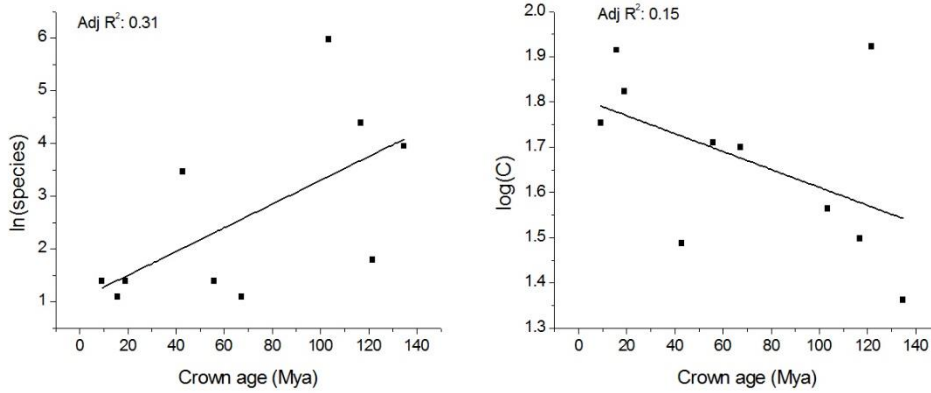

542  
543  
544  
545  
546

Figure 1S: OLS Regression analysis of crown age versus species richness and crown age vs genome size with *P. anguinus* included in the Proteidae family-level clade.

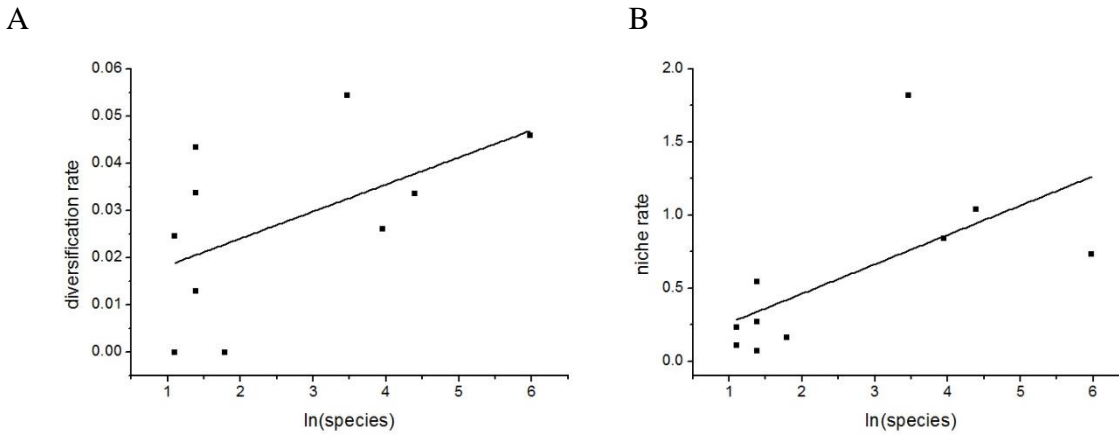

547  
548

Figure 2S: OLS regression of diversification rate (A) and niche rate (B) versus species richness.

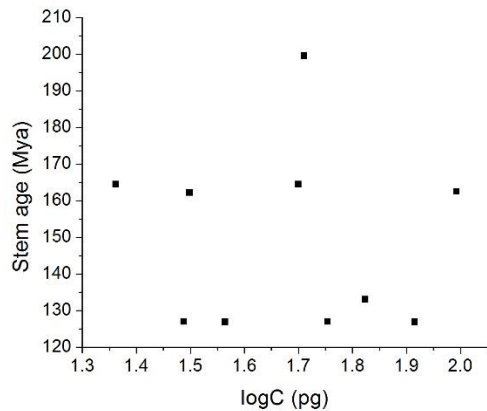

549  
550  
551

Figure 3S: Stem age versus C-value

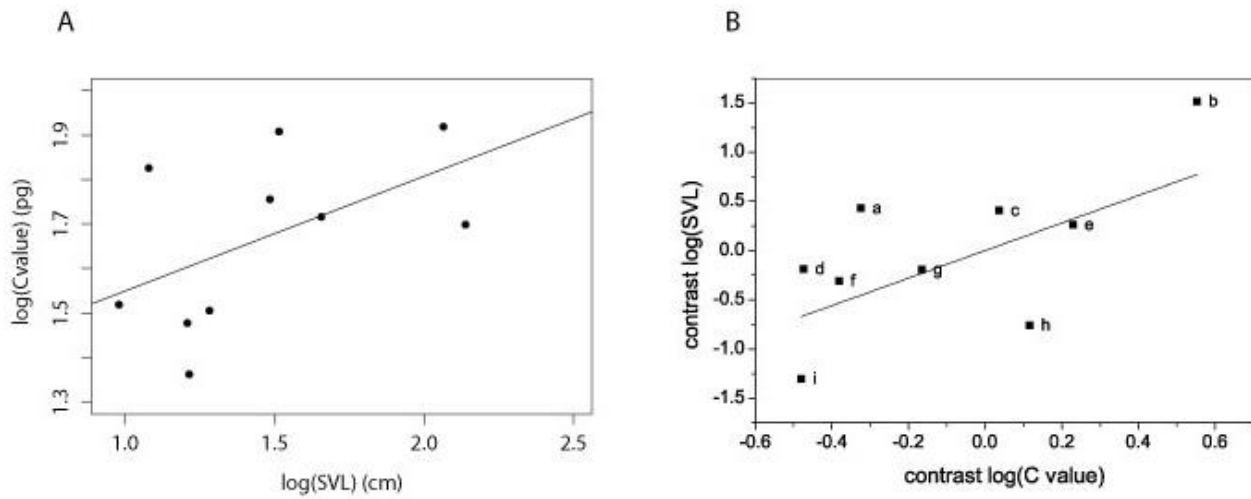

552  
553  
554  
555  
556  
557  
558

Figure 4S: A) SVL (body size) versus C-value. B) Independent contrasts of SVL (body size) vs. independent contrasts of C-value. The letters correspond to the nodes of the phylogenetic tree shown in Figure 1 in the main text.

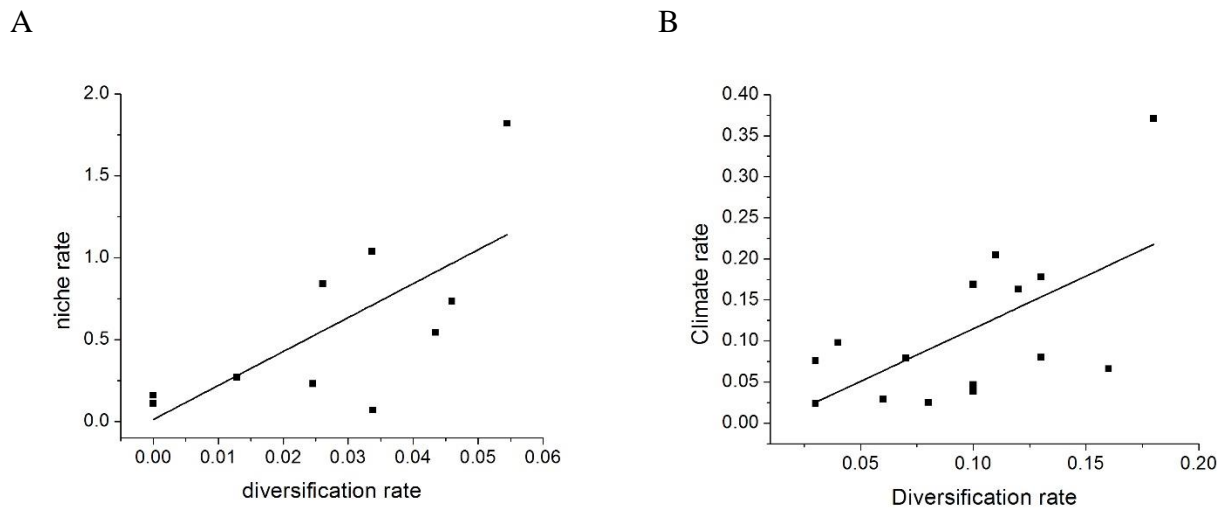

559  
560  
561  
562  
563

Figure 5S: Diversification rate versus niche rate for Salamanders family-level clades (A) and Plethodontidae from Kozak and Wiens (B) (Kozak and Wiens 2016)

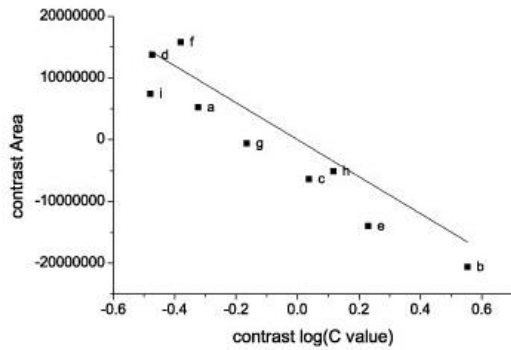

564

565

Figure 6S: Independent contrasts of C-value versus independent contrasts of area. Letters refer to nodes in the phylogenetic tree (see Figure 1).

566

567

568

### Supplementary Methods:

569

570

**Data on snout to vent length (SVL)** for the designated species were obtained from AmphibiaWeb

571

(<http://www.amphibiaweb.org>) using the Rafaelli account. Only those values were used for which the

572

genome size is represented in the Animal Genome Size Database. SVL is commonly used as a proxy for

573

body size, and is measured as the distance from the tip of the snout to the anterior posterior to the cloaca.

574

In some cases, only either male or female body size was available. When both male and female body

575

size were reported, the average of the two was used. Average SVL for each clade was calculated as

576

described for C-values in the main text.

577

**Independent contrasts**, pics, were carried out in R using the *ape* library based on the branch lengths of

578

the ML tree shown in Figure 1. The regression of the independent contrasts was forced through the

579

origin. The residuals of the regression for the independent contrasts (log C-value vs. log body size and

580

log C-value vs. area, respectively) were controlled for normality using the Shapiro-Wilk test, confirming

581

a normal distribution.

582

583

584

585

586
